# Supplementary material for: The Influence of Divergent Culture Media on Physicochemical Properties, Yield of Fungi Strain Agrocybe Cylindracea
Source: Preprints.org preprint supplement (doi:10.20944/preprints202410.1131.v1), 2024-10-15
Supplement: Supplementary file 1 [file supplementary]

## Sheet: Sheet1
Formulation of culture materials (%)
No	Giant grass	Dicranopterisdicholoma			Wasted tea leaves		Sawdust	Cottonseed hulls		Wheat bran	Lime
1	48	30								20	2
2					48		30			20	2
3								78		20	2

## Sheet: Sheet2
Proportion of organic compounds detected in the initial and spent substrates
Substrate	Lignin				Cellulose				Hemicellulose
	Initial		Spent		Initial		Spent		Initial		Spent
	Content%	total (g)	Content%	total (g)	Content%	total (g)	Content%	total (g)	Content%	total (g)	Content%	total (g)
GJ+DD	32.81±1.0b	116.04±3.8a	22.68±0.9ab	57.77±2.3a	27.75±0.6c	98.12±2.1b	21.27±0.4c	52.97±1.0b	28.14±1.7a	99.51±6.1a	21.1±3.1b	54.00±7.9a
WTL+SD	31.89±2.0b	135.12±8.8b	23.52±0.9b	70.39±2.9b	17.84±0.9a	75.60±4.1a	13.83±1.0a	41.38±3.1a	24.50±2.5a	103.8±11.0ab	23.16±1.2b	69.29±3.7b
CSH	28.92±2.0b	146.46±10.3b	21.42±0.7a	76.36±2.6c	22.01±2.0b	111.50±10.4c	18.51±1.3b	65.98±4.6c	23.83±2.0a	120.68±10.5b	16.01±1.1a	57.07±4.0a
Different letters indicate significantly different at the 0.05 level (P ≤ 0.05), results expressed as mean standard deviation.

## Sheet: Sheet3
PCR reaction system
Reaction components	Volume (µL)
DNA template	1
Forward primer (ITS1)	0.5
Reverse primer (ITS4)	0.5
2xTaq MasterMix	10
ddH2O	8
Total volume	20

## Sheet: Sheet4
PCR reaction procedure
Steps	Temperature	Duration		Cycle
Predenaturation	95℃	5 minutes		1
Denaturation	94℃	10 seconds
Annealing	58℃	45seconds		×30
Prolongation	72℃	30 seconds
Final	72℃	10minutes		1
Extension	16℃

## Sheet: Sheet5
Content of second spawn preparation
No		Substrate		Quantity/bottle (150 g)
1		Miscanthus Floridulus 40%		60
2		Dicranopteris Dicholoma 38%		57
3		Wheat bran 20%		30
4		Carbonate de calcium 1%		1.5
5		Lime 1%		1.5

## Sheet: Sheet6
Carbon content, total carbon, nitrogen content, and total nitrogen of culture substrate, spent substrate and fruiting body of AgrocybeCylindranceagrown in three different substrates.
					Carbon		Nitrogen
Culture substrate and fruiting body			Substrate	Dry weight (kg)	Content	Total (g)	Content	Total (g)
					(g · kg-1)		(g · kg-1)
Initial mushroom substrate			F1	3.59±0.07a	503.4±1.20a	1811.27±12.02a	16.03±0.01a	57.68±0.15a
			F2	4.19±0.06b	539.1±0.82b	2259.8±8.27b	34±0.01c	142.52±0.1c
			F3	4.28±0.94b	511.33±0.56a	2191.52±5.66b	21.86±0.02b	93.71±0.15b
Spent mushroom substrate			F1	2.17±0.08a	452.2±0.86a	984.59±8.60a	22.7±0.03a	49.42±0.32a
			F2	2.85±0.12b	494.36±0.16b	1413.13±1.65b	46.47±0.06c	132.82±0.68c
			F3	2.85±0.2b	466.13±1.05a	1329.68±10.55b	25.43±0.005b	72.55±0.05b
Fruiting body			F1	0.71±0.1a	442.43±0.9a	316.34±9.11a	37.8±0.25a	27.02±2.52a
			F2	1.49±0.03b	447.03±0.46a	666.88±4.68b	48.2±0.09c	71.90±0.98b
			F3	1.68±0.12c	444.4±0.37a	749.21±3.7b	39.53±0.62a	66.64±6.29ab

## Sheet: Sheet7
Metabolites detected A. Cylindracea maturity stage under the different treatments.
Metaboilites	F1_1	F1_2	F1_3	F2_1	F2_2	F2_3	F3_1	F3_2	F3_3	AVE
Glycerophosphocholine	1.36521e+06	1.53679e+06	1.93043e+06	2.07574e+06	2.43261e+06	2.42416e+06	1.87059e+06	1.72939e+06	1.78099e+06	1.9051e+06
16-Hydroxypalmitic acid	1.2286e+06	779760	1.13736e+06	1.00813e+06	2.49239e+06	2.39038e+06	749399	771579	329302	1.20966e+06
L-Leucine	537220	502190	740288	689328	725643	679767	775507	626491	731211	667516
alpha-Linolenic acid	520712	403498	360156	604212	701165	628264	666773	487421	643482	557298
Stearidonic Acid	365296	423786	595050	375727	1.02087e+06	950529	273534	307664	181458	499323
Dopamine	158104	126994	209065	452528	286680	476669	792174	503598	673819	408848
L-Glutamine	318676	358646	334367	454352	444895	677779	294671	272879	341879	388683
Caffeine	3593.63	2885.47	3585.08	911070	1.03521e+06	953678	13045.9	5086.73	7711.11	326208
L-Isoleucine	235754	253387	356779	349003	343831	356907	353845	317098	328998	321734
Norepinephrine	219278	245634	190881	296765	220621	353233	420956	346343	236946	281184
Acetylcarnitine	145358	174903	310659	232595	386305	355286	112339	459156	143955	257839
D-Proline	172548	144635	207244	300322	268636	280402	325477	220396	297476	246348
L-Pyroglutamic acid	131182	140697	119529	152466	156147	179048	122781	118396	125829	138453
L-Phenylalanine	61249.7	56222	121805	143125	103694	135189	183645	111228	301692	135317
Erucamide	110750	115487	19709.1	262320	169107	196351	98848.9	112031	105484	132232
Acetylcholine	90615.2	107791	153350	100081	94659.5	27874.3	130426	42498.8	45724.7	88113.4
Betaine	68140.8	65996.3	76401.2	90165.5	114605	84123.9	122352	70301.3	86912.4	86555.4
L-Methionine	65980.1	64301.6	86324.3	90002.4	94599.2	93853.1	96490.8	79459.5	89512.9	84502.7
2-Methylbutyroylcarnitine	99753.8	135289	90881.1	73517.3	65237.9	78234	61230.8	121079	34560.3	84420.4
Tyramine	39044.9	36399.4	75040.9	89700	67742.9	91463.5	109187	69997.8	179526	84233.6
Uridine	50980.8	48091.9	58911.7	108888	88922.1	116016	63409.8	56726.7	58802.7	72305.5
Hypoxanthine	24925	24849.8	31268.7	83791.6	50516.1	54746.3	116299	71729	173185	70145.7
L-Pipecolic acid	48602.8	49890	57628.4	68381.2	75497.5	78973.1	54302.3	63018.4	69044.8	62815.4
all cis-(6,9,12)-Linolenic acid	44821.2	58904.4	14705.9	57551.5	123315	50215.2	83245.2	35706.2	81060.6	61058.3
L-Alanine	34525	36782.1	45713.4	72091.1	63940.4	86746.4	70112.9	50869.4	67925.2	58745.1
Uracil	36175.3	33217.9	36458.9	57797.6	49482.1	53614.1	77266.7	46935.5	101166	54679.4
DL-O-tyrosine	54977.7	56413.5	50827.8	47309.4	42737.3	48880.9	61663.7	53902.6	57134.7	52649.7
Thioetheramide-PC	34001.5	24999.9	8854.28	98821.9	48287.6	47294.1	66533	55314.1	79393.8	51500
L-Threonine	33252.1	37598.8	48066.1	53392.7	59171.6	55965.4	55615.7	55598.3	55804.8	50496.2
N-Acetyl-D-Glucosamine 6-Phosphate	32288.4	36856.8	32356.5	48309.8	50780.9	57845.7	53029.2	61415.3	69192.2	49119.4
Methoprene (S)	39010.1	33222.2	11409.1	55898	119105	91170.4	27577.2	20386.7	30735.7	47612.7
4-Aminobutyric acid	20648	22039.1	38906.9	48566.1	66977	68286.8	29485.6	38970.8	42433.9	41812.7
cis-9-Palmitoleic acid	24105	22704.9	15520	86370.5	51419.7	34465.8	46304.1	35875.6	49203.3	40663.2
Val-Trp	50785.4	53402.6	65599.4	22592.5	45918	46644.4	24622.6	31263.4	13618.9	39383
UDP-D-Galactose	18317.5	27782.7	17428.9	43218.2	44208.9	36533.6	44755	45260.3	73154.2	38962.1
D-Mannitol	50883.1	58858.5	45755.8	26979.9	15382.6	6546.54	70867.6	30938.8	36891.8	38122.7
1-Aminocyclopropanecarboxylic acid	33300.3	38383.5	35104.4	43498.8	41158.7	59518.6	26718.3	26905.8	32753	37482.4
Uridine 5'-monophosphate (UMP)	25471.5	32323.3	17241.1	33695.8	40341.8	47394	31032.9	31503.4	24662.9	31518.5
L-Glutamate	29200.8	25210	24462.8	31387.8	45771.3	40491.6	25737.8	25932.3	25888.4	30453.6
1,2-dioleoyl-sn-glycero-3-phosphatidylcholine	7877.32	6423.13	5392.83	55448.9	57459.4	25631.7	26171.3	36690.7	36365.8	28606.8
N-Acetyl-D-glucosamine	19256.4	25728.8	28221.8	25886.3	55728.8	41899.1	26055	19264.5	13273	28368.2
1-Oleoyl-sn-glycero-3-phosphocholine	23229.9	16183.3	12834.8	39764.8	50071.8	26075.7	21658.7	28102.5	27942	27318.2
DL-3-Hydroxybutyric acid	12920	14469.7	24607.5	31672.6	43464.4	44702.3	17930.4	24616.8	27341.1	26858.3
Nicotinate	12239.6	13667.5	4456.63	31202.6	46371.1	45520.6	7167.32	25473	7768.36	21540.7
Betaine aldehyde	22950.9	24467.4	28762.3	13042.5	10576.4	10860.5	8067.43	6079.18	44755.8	18840.3
Uridine 5'-diphosphate (UDP)	6923.67	11274.8	7384.62	17603.8	17356.2	14381.5	16847.2	17349.7	26125	15027.4
UDP-N-acetylglucosamine	13484.5	16012.4	6998.63	16098	20137.2	21347.2	6557.36	16643	9643.34	14102.4
Allantoate/Allantoic acid	8190.3	9681.67	12492.2	16458.2	15697.4	37894.9	5584.4	11707.3	5027.23	13637.1
Glutathione	6298.56	7058.99	8522.56	20028.4	20308.2	12290.1	19761.9	7442.65	13897.3	12845.4
Pro-Ser	16804.9	18563.1	19742.3	3266.33	7226.85	3418.18	17498.9	11238	14470.9	12469.9
Phe-Ala	13187.1	17980.8	16515.8	8032.28	13875.8	12525.3	8124.26	11133.1	5387.09	11862.4
L-Carnitine	13142.9	13788.1	15155.4	8163.47	9289.83	5313.15	15576.5	17819	6347.34	11621.7
N6-Acetyl-L-lysine	11808.6	14714.8	21215.4	13220.3	2962.97	5601.11	6708.47	19166.8	7965.48	11484.9
Phe-Thr	12398	18192.2	16450.2	7897.76	12888.8	11362	7758.39	10620.6	5488.04	11450.7
Leu-Ile	9614.53	14226.2	12038	9003.4	11390.2	5745.59	10108.9	4223.87	9038.68	9487.71
2-Ethoxyethanol	10693	12057.1	9975.69	6764.94	7483.23	7458.6	10057.3	10346.9	8575.73	9268.07
Ribitol	11510	12550.6	19331.5	4978.71	9611.39	2808.56	7023.91	4717.98	4781.96	8590.51
Diacetyl	8338.84	9786.27	12417.4	8919.71	8567.8	2997.84	12339.5	5730.44	4442.48	8171.15
Sarcosine	4529.64	3444.03	5683.43	9944.33	6797.17	12701.1	10024.8	5982.31	9578.36	7631.68
Ile-Pro	10140.5	10259.8	9861.87	3215.1	9263.9	6929.62	5298.92	6333.79	6219.25	7502.54
L-Norleucine	6305.53	3877.68	5081.36	9747	9396.28	15394.8	4525.41	7812.83	4468.09	7401
Phe-Gln	7080.11	8898.95	10109.1	4658.42	7730.22	7112.29	5903.77	7144.71	5390.69	7114.25
Glycerol 3-phosphate	1285.65	1727.63	2419.8	9845.02	7619.2	5792.42	9587.22	3481.99	19289.7	6783.18
1-Stearoyl-2-oleoyl-sn-glycerol 3-phosphocholine (SOPC)	1259.89	2002.66	722.742	10938	11913.6	5663.72	6088.56	6282.41	7535.14	5822.97
Ergothioneine	2759.01	3033.03	3587.58	8259.3	10816.8	10013.9	4400.01	2326.14	3610.67	5422.94
L-Citrulline	2345.55	2801.92	900.112	8923.42	11080.6	13499.2	3492.94	1015.55	3250.84	5256.68
4-Methylumbelliferyl beta-D-glucuronide	7143.08	7292.49	5864.84	3661.13	3420.29	3955.47	4565.79	5006.65	4156.23	5007.33
Xylitol	5271.75	5630.47	8553.51	2056.93	4949.88	1405.57	3372.03	2153.49	2221.45	3957.23

## Sheet: Sheet8
Performance of metabolites detected in the GJ+DD compared with the WTL+SD culture medium.
Metabolites	baseMean	log2FoldChange	lfcSE	stat	pvalue	padj	Metabolites performance
Caffeine	403226	7.65393	0.156995	48.7527	0	0	Enriched
Betaine aldehyde	19861.8	-1.65258	0.207379	-7.96887	1.6e-15	5.44e-14	Depleted
Pro-Ser	12844.3	-2.50694	0.371903	-6.74083	1.57e-11	3.57e-10	Depleted
4-Methylumbelliferyl beta-D-glucuronide	5574.89	-1.40678	0.238944	-5.88749	3.92e-09	6.67e-08	Depleted
1,2-dioleoyl-sn-glycero-3-phosphatidylcholine	23319.8	2.30351	0.397657	5.79271	6.93e-09	9.42e-08	Enriched
2-Ethoxyethanol	9520.51	-1.11931	0.202963	-5.51488	3.49e-08	3.96e-07	Depleted
Ergothioneine	5869.14	1.11389	0.20995	5.30549	1.12e-07	1.09e-06	Enriched
L-Carnitine	11509.6	-1.39448	0.297591	-4.6859	2.79e-06	2.37e-05	Depleted
2-Methylbutyroylcarnitine	95177.1	-1.11731	0.252657	-4.42226	9.77e-06	7.38e-05	Depleted
1-Stearoyl-2-oleoyl-sn-glycerol 3-phosphocholine (SOPC)	4789.71	2.30791	0.528123	4.37002	1.24e-05	8.45e-05	Enriched
DL-O-tyrosine	51512	-0.74668	0.174149	-4.28759	1.81e-05	0.000111656	Depleted
D-Mannitol	37939	-2.16256	0.510652	-4.2349	2.29e-05	0.000129571	Depleted
Glycerol 3-phosphate	4320.21	1.60471	0.382415	4.19626	2.71e-05	0.000141939	Enriched
L-Citrulline	5829.48	1.91341	0.489084	3.91223	9.14e-05	0.000444183	Enriched
Phe-Thr	13766.3	-1.07853	0.279685	-3.85623	0.000115149	0.00052201	Depleted
Ribitol	10949.1	-1.81739	0.484006	-3.7549	0.000173413	0.000737005	Depleted
Val-Trp	49314.6	-1.09028	0.303162	-3.59636	0.000322697	0.00129079	Depleted
Phe-Ala	14202.6	-1.00092	0.279953	-3.57532	0.000349803	0.00132148	Depleted
Phe-Gln	7839.89	-0.944473	0.277491	-3.40361	0.000665011	0.00238004	Depleted
Xylitol	4992.73	-1.71336	0.526049	-3.25704	0.00112582	0.00382778	Depleted
Nicotinate	23073.4	1.46405	0.461184	3.17454	0.00150075	0.00485957	Enriched
Ile-Pro	8670.28	-1.1788	0.400244	-2.9452	0.00322748	0.00997583	Depleted
N6-Acetyl-L-lysine	12469.4	-1.608	0.564098	-2.85058	0.00436399	0.0129022	Depleted
Dopamine	265624	0.792674	0.285732	2.77419	0.00553392	0.0156794	Enriched
Leu-Ile	10776.2	-0.971027	0.357392	-2.71698	0.00658808	0.0179196	Depleted
Uridine	74684.6	0.475209	0.17922	2.65153	0.00801269	0.0209563	Enriched
Hypoxanthine	42432.8	0.722252	0.289803	2.49222	0.0126947	0.0309599	Enriched
Glutathione	11666.1	0.763698	0.306617	2.49073	0.0127482	0.0309599	Enriched
DL-3-Hydroxybutyric acid	26690.8	0.694331	0.289922	2.39489	0.0166254	0.0389838	Enriched
Acetylcholine	100562	-1.1435	0.494581	-2.31206	0.0207743	0.0470884	Depleted
4-Aminobutyric acid	41295	0.662438	0.288529	2.29591	0.0216808	0.047558	Enriched
Diacetyl	8905.8	-1.06618	0.473037	-2.25391	0.0242016	0.0500085	Depleted
cis-9-Palmitoleic acid	36722.4	0.959552	0.425929	2.25285	0.0242688	0.0500085	Enriched
Methoprene (S)	53456.4	1.1133	0.503615	2.21061	0.0270628	0.0541257	Enriched
L-Alanine	53881.3	0.412133	0.191045	2.15726	0.0309852	0.0601999	Enriched
L-Norleucine	7769.67	0.649702	0.31523	2.06104	0.0392989	0.0742312	Enriched
Sarcosine	6749.94	0.595717	0.330253	1.80382	0.0712589	0.130962	Enriched
Thioetheramide-PC	41037.2	0.995961	0.556373	1.7901	0.0734385	0.131416	Enriched
Allantoate/Allantoic acid	15544.8	0.67385	0.390053	1.72759	0.0840625	0.14657	Enriched
1-Oleoyl-sn-glycero-3-phosphocholine	26578.5	0.628289	0.375923	1.67132	0.094658	0.160919	Enriched
UDP-D-Galactose	29925.1	0.437512	0.294805	1.48407	0.13779	0.228529	Enriched
L-Leucine	640726	-0.272865	0.186553	-1.46267	0.143557	0.232426	Depleted
Uridine 5'-diphosphate (UDP)	11969.9	0.423137	0.311853	1.35685	0.174829	0.276474	Enriched
Erucamide	137507	0.807145	0.605925	1.33209	0.182831	0.282558	Enriched
L-Pyroglutamic acid	145308	-0.210777	0.174929	-1.20493	0.228231	0.344883	Depleted
16-Hydroxypalmitic acid	1.42662e+06	0.372387	0.36619	1.01692	0.30919	0.439008	Enriched
L-Isoleucine	311979	-0.197227	0.194166	-1.01577	0.309741	0.439008	Depleted
D-Proline	221266	0.187426	0.184573	1.01546	0.309888	0.439008	Enriched
L-Methionine	81280.4	-0.149564	0.158596	-0.943045	0.345658	0.479688	Depleted
all cis-(6,9,12)-Linolenic acid	56004.6	0.413568	0.570315	0.725158	0.468355	0.626552	Enriched
Tyramine	63897.5	0.229513	0.319703	0.717896	0.472822	0.626552	Enriched
N-Acetyl-D-glucosamine	31450	0.228216	0.322472	0.707706	0.479128	0.626552	Enriched
Stearidonic Acid	592990	0.233739	0.385103	0.606951	0.543883	0.697671	Enriched
N-Acetyl-D-Glucosamine 6-Phosphate	41863.4	0.101564	0.171639	0.591728	0.554033	0.697671	Enriched
L-Phenylalanine	99723.6	0.182108	0.334399	0.544583	0.58604	0.723816	Enriched
Uracil	43310.9	0.088805	0.167544	0.530041	0.596084	0.723816	Enriched
L-Glutamine	417950	0.109392	0.219397	0.4986	0.618061	0.735202	Enriched
Uridine 5'-monophosphate (UMP)	31780.6	0.15036	0.318445	0.47217	0.636805	0.735202	Enriched
Norepinephrine	251082	-0.121151	0.257416	-0.470642	0.637896	0.735202	Depleted
1-Aminocyclopropanecarboxylic acid	41089.3	-0.0960361	0.210966	-0.455221	0.64895	0.735477	Depleted
Acetylcarnitine	257426	0.116897	0.329019	0.35529	0.722373	0.805268	Enriched
Betaine	81714.8	-0.0584771	0.195836	-0.298603	0.765243	0.828267	Depleted
UDP-N-acetylglucosamine	15285	0.110508	0.379839	0.290934	0.771102	0.828267	Enriched
alpha-Linolenic acid	523525	0.0638114	0.22797	0.279912	0.779545	0.828267	Enriched
L-Glutamate	31902.5	0.0481835	0.216175	0.222892	0.82362	0.861633	Enriched
L-Threonine	46787.4	-0.00930273	0.183164	-0.0507891	0.959494	0.97684	Depleted
L-Pipecolic acid	61686.4	-0.00540142	0.124804	-0.0432791	0.965479	0.97684	Depleted
Glycerophosphocholine	1.91153e+06	0.0049631	0.170956	0.0290314	0.97684	0.97684	Enriched

## Sheet: Sheet9
Performance of metabolites detected in the GJ+DD compared with the CSH culture medium.
Metabolites	baseMean	log2FoldChange	lfcSE	stat	pvalue	padj	Metabolites performance
Dopamine	384822	1.85423	0.249889	7.42019	1.17e-13	6.88e-12	Eriched
1,2-dioleoyl-sn-glycero-3-phosphatidylcholine	18842.4	2.208	0.300521	7.34725	2.02e-13	6.88e-12	Eriched
Hypoxanthine	69085	2.01385	0.348267	5.78249	7.36e-09	1.67e-07	Eriched
Ribitol	9846.64	-1.53156	0.279157	-5.48638	4.1e-08	6.97e-07	Depleted
Xylitol	4465.91	-1.4698	0.287869	-5.10579	3.29e-07	4.48e-06	Depleted
1-Stearoyl-2-oleoyl-sn-glycerol 3-phosphocholine (SOPC)	3767.83	2.1735	0.44828	4.84853	1.24e-06	1.41e-05	Eriched
Ile-Pro	7915.26	-0.888251	0.202891	-4.37797	1.2e-05	0.000116365	Depleted
Glycerol 3-phosphate	5850.76	2.42847	0.607486	3.99758	6.4e-05	0.000543947	Eriched
Val-Trp	39571.4	-1.40556	0.373977	-3.7584	0.000171004	0.00129203	Depleted
UDP-D-Galactose	36098.1	1.22167	0.346943	3.52125	0.000429511	0.00292068	Eriched
cis-9-Palmitoleic acid	30845.3	0.927079	0.2706	3.42601	0.00061252	0.00378649	Eriched
Caffeine	5609.98	1.19581	0.355108	3.36744	0.0007587	0.0042993	Eriched
N-Acetyl-D-Glucosamine 6-Phosphate	45779.8	0.72612	0.218062	3.32988	0.00086885	0.00454475	Eriched
Uridine 5'-diphosphate (UDP)	13703.8	1.0999	0.339332	3.24138	0.00118954	0.00577776	Eriched
Uracil	52469.5	0.943473	0.304204	3.10144	0.00192579	0.00873025	Eriched
Stearidonic Acid	352129	-0.979145	0.319476	-3.06485	0.00217781	0.00892257	Depleted
Phe-Thr	11713.8	-1.09764	0.358978	-3.05767	0.00223064	0.00892257	Depleted
4-Methylumbelliferyl beta-D-glucuronide	5585.91	-0.697085	0.230108	-3.02939	0.0024505	0.00894244	Depleted
L-Alanine	48808.6	0.551612	0.182441	3.02351	0.00249862	0.00894244	Eriched
Phe-Ala	11945.5	-1.07082	0.365169	-2.93238	0.0033637	0.0114366	Depleted
Thioetheramide-PC	42665.6	1.41324	0.514084	2.74904	0.00597697	0.019354	Eriched
Pro-Ser	15955.5	-0.498127	0.183222	-2.7187	0.00655381	0.0202572	Depleted
Sarcosine	6216.93	0.763235	0.287246	2.65708	0.007882	0.0224382	Eriched
D-Proline	217935	0.544697	0.205121	2.65549	0.00791935	0.0224382	Eriched
L-Phenylalanine	131636	1.18703	0.464643	2.55471	0.0106276	0.0289072	Eriched
Tyramine	80331.3	1.12267	0.44542	2.52047	0.0117198	0.0306518	Eriched
Phe-Gln	7285.75	-0.621477	0.258062	-2.40825	0.0160293	0.0403702	Depleted
1-Aminocyclopropanecarboxylic acid	31510.9	-0.439331	0.189274	-2.32114	0.0202791	0.0492493	Depleted
16-Hydroxypalmitic acid	819221	-0.892456	0.406806	-2.19381	0.0282488	0.0662386	Depleted
Leu-Ile	9641.67	-0.780873	0.367129	-2.12697	0.0334224	0.0757575	Depleted
Glutathione	9916.5	0.747331	0.359104	2.0811	0.0374251	0.0820938	Eriched
L-Threonine	45960.7	0.363326	0.193717	1.87555	0.0607175	0.129025	Eriched
Acetylcholine	92145.9	-0.855841	0.470526	-1.8189	0.0689263	0.14203	Depleted
L-Glutamine	312319	-0.289731	0.167991	-1.72468	0.0845853	0.169171	Depleted
Norepinephrine	266226	0.469947	0.281346	1.67035	0.0948498	0.18428	Eriched
2-Ethoxyethanol	10056.4	-0.30965	0.206994	-1.49594	0.13467	0.247578	Depleted
N-Acetyl-D-glucosamine	21384.7	-0.463103	0.309607	-1.49578	0.134712	0.247578	Depleted
alpha-Linolenic acid	494683	0.33757	0.232864	1.44965	0.147157	0.256688	Eriched
Diacetyl	8568.64	-0.599923	0.413904	-1.44943	0.147218	0.256688	Depleted
L-Pyroglutamic acid	123324	-0.229468	0.163205	-1.40602	0.159719	0.271523	Depleted
1-Oleoyl-sn-glycero-3-phosphocholine	21014.1	0.443179	0.333434	1.32913	0.183804	0.298492	Eriched
2-Methylbutyroylcarnitine	89856.1	-0.694995	0.52356	-1.32744	0.184363	0.298492	Depleted
Betaine	78321.7	0.258166	0.214354	1.20439	0.228438	0.35616	Eriched
Allantoate/Allantoic acid	8661.14	-0.539543	0.449925	-1.19918	0.230456	0.35616	Depleted
N6-Acetyl-L-lysine	13442.6	-0.578734	0.523029	-1.10651	0.268508	0.405745	Depleted
all cis-(6,9,12)-Linolenic acid	50761.7	0.576828	0.575588	1.00215	0.316269	0.460394	Eriched
L-Methionine	77510.1	0.159452	0.16173	0.985915	0.324175	0.460394	Eriched
D-Mannitol	47457.1	-0.33413	0.34089	-0.980169	0.327003	0.460394	Depleted
4-Aminobutyric acid	31012.3	0.332015	0.342077	0.970586	0.331755	0.460394	Eriched
L-Glutamate	25410.9	-0.157996	0.171449	-0.921533	0.356772	0.48521	Depleted
DL-3-Hydroxybutyric acid	19653	0.316654	0.351576	0.90067	0.367764	0.490352	Eriched
Betaine aldehyde	21986.6	-0.504681	0.739821	-0.682166	0.495134	0.646558	Depleted
L-Leucine	628967	0.128408	0.193502	0.663602	0.506945	0.646558	Eriched
L-Pipecolic acid	55399.9	0.131172	0.200727	0.653486	0.513443	0.646558	Eriched
L-Isoleucine	297199	0.112183	0.203083	0.552402	0.580673	0.717923	Eriched
UDP-N-acetylglucosamine	11458.1	-0.263432	0.524647	-0.502113	0.615588	0.738403	Depleted
Methoprene (S)	26454.7	-0.247211	0.497075	-0.497332	0.618955	0.738403	Depleted
L-Carnitine	13314.1	-0.206306	0.43489	-0.474385	0.635225	0.744747	Depleted
Nicotinate	11692.9	0.313553	0.689732	0.454601	0.649396	0.748457	Eriched
Uridine	54369.7	0.0466139	0.121634	0.383229	0.70155	0.79509	Eriched
DL-O-tyrosine	54212.6	-0.0490968	0.133834	-0.366849	0.713731	0.795635	Depleted
Erucamide	91531.1	0.213233	0.634174	0.336237	0.736692	0.807985	Eriched
L-Citrulline	2209.86	0.17362	0.624436	0.278043	0.780979	0.842962	Eriched
Uridine 5'-monophosphate (UMP)	26331.4	0.0749242	0.327729	0.228616	0.819167	0.870365	Eriched
Acetylcarnitine	221080	0.116309	0.635923	0.182898	0.854878	0.894334	Eriched
Glycerophosphocholine	1.64852e+06	0.0250435	0.175467	0.142725	0.886508	0.913371	Eriched
L-Norleucine	5229.89	0.029931	0.390003	0.0767455	0.938826	0.952838	Eriched
Ergothioneine	3162.9	-0.0111537	0.272886	-0.0408731	0.967397	0.967397	Depleted

## Sheet: Sheet10
Performance of metabolites detected in the WTL+SD compared with the CSH culture medium.
Meta	baseMean	log2FoldChange	lfcSE	stat	pvalue	padj	Metabolites performance
Caffeine	459316	-6.6047	0.346877	-19.0405	7.88e-81	5.36e-79	Depleted
Pro-Ser	10001.8	1.87468	0.392571	4.77539	1.79e-06	5.76e-05	Enriched
Methoprene (S)	55616	-1.52623	0.324405	-4.70471	2.54e-06	5.76e-05	Depleted
L-Citrulline	6661.03	-1.91102	0.50804	-3.76155	0.000168861	0.00287064	Depleted
Ergothioneine	6426.89	-1.27922	0.347989	-3.67605	0.000236874	0.00322149	Depleted
Stearidonic Acid	504229	-1.37881	0.409614	-3.36612	0.000762332	0.00863976	Depleted
16-Hydroxypalmitic acid	1.25494e+06	-1.43025	0.445325	-3.2117	0.0013195	0.0124897	Depleted
D-Mannitol	32836.2	1.69937	0.534282	3.18067	0.00146937	0.0124897	Enriched
Hypoxanthine	95563.6	1.13029	0.393686	2.87106	0.004091	0.0309098	Enriched
Dopamine	551260	0.891356	0.320556	2.78066	0.00542489	0.0368893	Enriched
Erucamide	157436	-0.778036	0.284616	-2.73364	0.00626389	0.0373121	Depleted
Allantoate/Allantoic acid	15250.1	-1.42514	0.524496	-2.71716	0.00658449	0.0373121	Depleted
Nicotinate	26792.2	-1.34945	0.534286	-2.52571	0.0115466	0.0591361	Depleted
Uridine	82282	-0.600805	0.239648	-2.50703	0.0121751	0.0591361	Depleted
DL-O-tyrosine	53441.6	0.526732	0.214111	2.46009	0.0138904	0.0610792	Enriched
2-Ethoxyethanol	8715.74	0.639781	0.261366	2.44784	0.0143716	0.0610792	Enriched
N-Acetyl-D-glucosamine	29839	-0.84114	0.375588	-2.23953	0.0251216	0.0985461	Depleted
L-Carnitine	10864.5	1.04065	0.467724	2.22493	0.0260857	0.0985461	Enriched
L-Phenylalanine	168756	0.841031	0.391433	2.1486	0.0316664	0.113332	Enriched
UDP-D-Galactose	49250.5	0.616063	0.290755	2.11884	0.0341043	0.113618	Enriched
Uracil	66296.2	0.690206	0.327524	2.10734	0.0350879	0.113618	Enriched
L-Glutamine	415096	-0.583605	0.279717	-2.08641	0.0369412	0.114182	Depleted
L-Norleucine	8561.2	-0.814159	0.423962	-1.92036	0.0548127	0.158803	Depleted
Tyramine	104538	0.726481	0.382372	1.89993	0.0574418	0.158803	Enriched
1-Aminocyclopropanecarboxylic acid	38554.2	-0.526909	0.279568	-1.88473	0.0594667	0.158803	Depleted
DL-3-Hydroxybutyric acid	31588.9	-0.548573	0.294094	-1.8653	0.0621394	0.158803	Depleted
N-Acetyl-D-Glucosamine 6-Phosphate	58325.6	0.446806	0.240372	1.85881	0.063054	0.158803	Enriched
4-Aminobutyric acid	49122.4	-0.499981	0.277469	-1.80194	0.0715555	0.173778	Depleted
Uridine 5'-diphosphate (UDP)	18768.7	0.509274	0.294322	1.73033	0.0835712	0.19596	Enriched
4-Methylumbelliferyl beta-D-glucuronide	4255.68	0.533626	0.326015	1.63682	0.101669	0.2242	Enriched
L-Glutamate	32565.5	-0.372235	0.227773	-1.63424	0.102209	0.2242	Depleted
Betaine aldehyde	16124.3	0.974552	0.682501	1.42791	0.153317	0.325798	Enriched
UDP-N-acetylglucosamine	15119.5	-0.567933	0.423959	-1.33959	0.180377	0.360961	Depleted
L-Leucine	717992	0.243031	0.181465	1.33928	0.180481	0.360961	Enriched
N6-Acetyl-L-lysine	9803.97	0.84469	0.656889	1.28589	0.19848	0.385618	Enriched
Norepinephrine	321453	0.411621	0.333511	1.2342	0.217127	0.410129	Enriched
Glycerol 3-phosphate	9512.03	0.675035	0.584485	1.15492	0.248122	0.445097	Enriched
Val-Trp	30742	-0.487461	0.426786	-1.14217	0.253385	0.445097	Depleted
L-Threonine	57000.4	0.209146	0.183844	1.13763	0.255277	0.445097	Enriched
1-Oleoyl-sn-glycero-3-phosphocholine	32308.1	-0.339544	0.315399	-1.07655	0.28168	0.478856	Depleted
Uridine 5'-monophosphate (UMP)	35046.4	-0.255801	0.264589	-0.966787	0.33365	0.553371	Depleted
L-Pyroglutamic acid	143845	-0.19316	0.203388	-0.949714	0.342258	0.554131	Depleted
D-Proline	287259	0.198112	0.234616	0.84441	0.398441	0.630092	Enriched
Glycerophosphocholine	2.07087e+06	-0.144477	0.180272	-0.80144	0.422877	0.63531	Depleted
L-Isoleucine	347818	0.146212	0.184439	0.79274	0.42793	0.63531	Enriched
L-Methionine	92180.8	0.147522	0.186834	0.789588	0.429768	0.63531	Enriched
1-Stearoyl-2-oleoyl-sn-glycerol 3-phosphocholine (SOPC)	8090.21	-0.288996	0.378421	-0.763688	0.445053	0.643907	Depleted
1,2-dioleoyl-sn-glycero-3-phosphatidylcholine	39854.5	-0.246689	0.37567	-0.656665	0.511396	0.709273	Depleted
Thioetheramide-PC	67606.3	0.248058	0.38467	0.644859	0.519019	0.709273	Enriched
Betaine	95893.4	0.170779	0.270754	0.630751	0.528203	0.709273	Enriched
Diacetyl	7277.38	0.350581	0.560908	0.625025	0.531955	0.709273	Enriched
Phe-Ala	9907.61	-0.240894	0.404999	-0.594801	0.551977	0.721816	Depleted
alpha-Linolenic acid	630429	0.112131	0.20289	0.552668	0.58049	0.74478	Enriched
2-Methylbutyroylcarnitine	74478.9	0.234284	0.464538	0.504338	0.614024	0.767043	Enriched
Phe-Thr	9409.32	-0.189096	0.385848	-0.490078	0.624079	0.767043	Depleted
cis-9-Palmitoleic acid	51192.4	-0.186288	0.388617	-0.47936	0.631683	0.767043	Depleted
Phe-Gln	6427.47	0.15489	0.345731	0.448007	0.654148	0.780387	Enriched
Glutathione	15663	-0.149165	0.414218	-0.360114	0.718762	0.830621	Depleted
Ribitol	5682.15	0.170143	0.495188	0.343593	0.731153	0.830621	Enriched
Acetylcarnitine	285788	-0.182877	0.535872	-0.341269	0.732901	0.830621	Depleted
Acetylcholine	74169.4	0.18238	0.561593	0.324756	0.745366	0.8309	Enriched
Ile-Pro	6272.88	0.126417	0.44306	0.285326	0.775394	0.850432	Enriched
Xylitol	2696.5	0.130666	0.574997	0.227247	0.820232	0.885329	Enriched
L-Pipecolic acid	69144.6	-0.0354057	0.225254	-0.157181	0.875102	0.929796	Depleted
Leu-Ile	8296.35	0.0557159	0.437355	0.127393	0.898629	0.930942	Enriched
L-Alanine	69580.1	-0.0317951	0.262413	-0.121164	0.903561	0.930942	Depleted
all cis-(6,9,12)-Linolenic acid	71749.8	0.0257038	0.432295	0.0594589	0.952587	0.966804	Enriched
Sarcosine	9323.07	-0.00845252	0.395627	-0.0213648	0.982955	0.982955	Depleted
